# Supplementary material for: Therapeutic Effect of Endothelin-Converting Enzyme Inhibitor on Chronic Kidney Disease through the Inhibition of Endoplasmic Reticulum Stress and the NLRP3 Inflammasome
Source: PubMed Central journal article supplement (PMC8067871; doi:10.3390/biomedicines9040398), 2021-04-07
Supplement: biomedicines-09-00398-s001.pdf [file biomedicines-09-00398-s001.pdf]

# Supplementary Materials: Therapeutic effect of endothelin-converting enzyme inhibitor on chronic kidney disease through the inhibition of endoplasmic reticulum stress and the NLRP3 inflammasome

Yung-Ho Hsu<sup>†</sup>, Cai-Mei Zheng, Chu-Lin Chou, Yi-Jie Chen, Yu-Hsuan Lee<sup>†</sup>, Yuh-Feng Lin\* and Hui-Wen Chiu\*

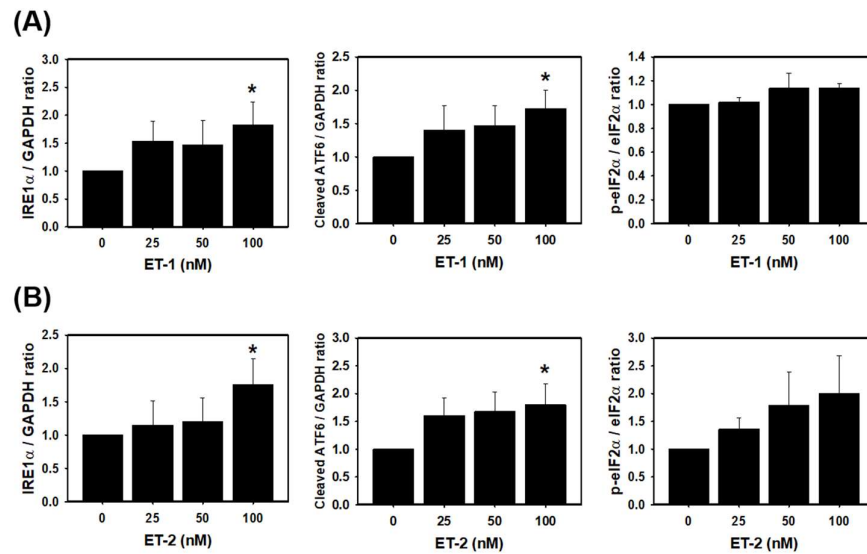

**Figure S1.** Effects of ET-1 (A) or ET-2 (B) exposure on the ER stress in human kidney cells. The ER stress-related proteins expression of histogram represent the average normalized densitometric values. GAPDH was used as the internal control. Data are presented as the means  $\pm$  standard deviation of three independent experiments. \*P < 0.05 compared with the control.

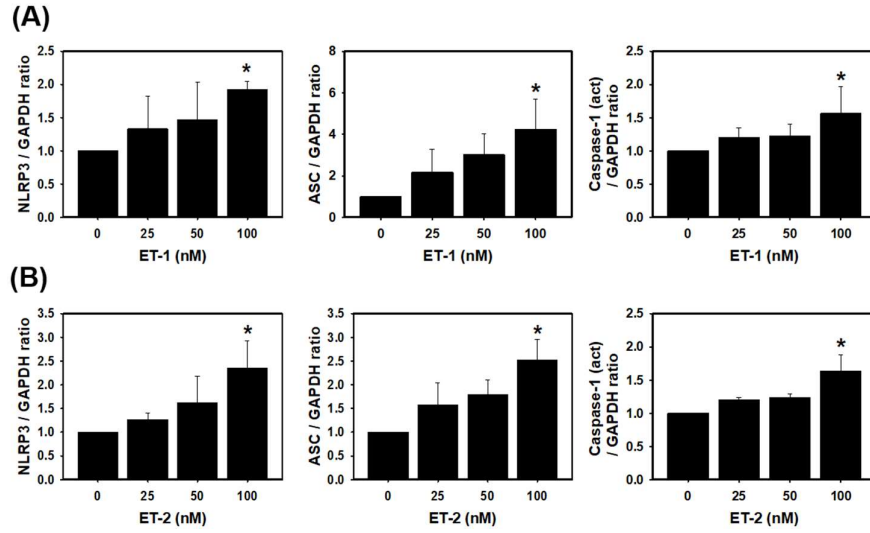

**Figure S2.** Effects of ET-1 (A) or ET-2 (B) exposure on the NLRP3 inflammasome in human kidney cells. The NLRP3 inflammasome-related proteins expression of histogram represent the average normalized densitometric values. GAPDH was used as the internal control. Data are presented as the means  $\pm$  standard deviation of three independent experiments. \*P < 0.05 compared with the control.

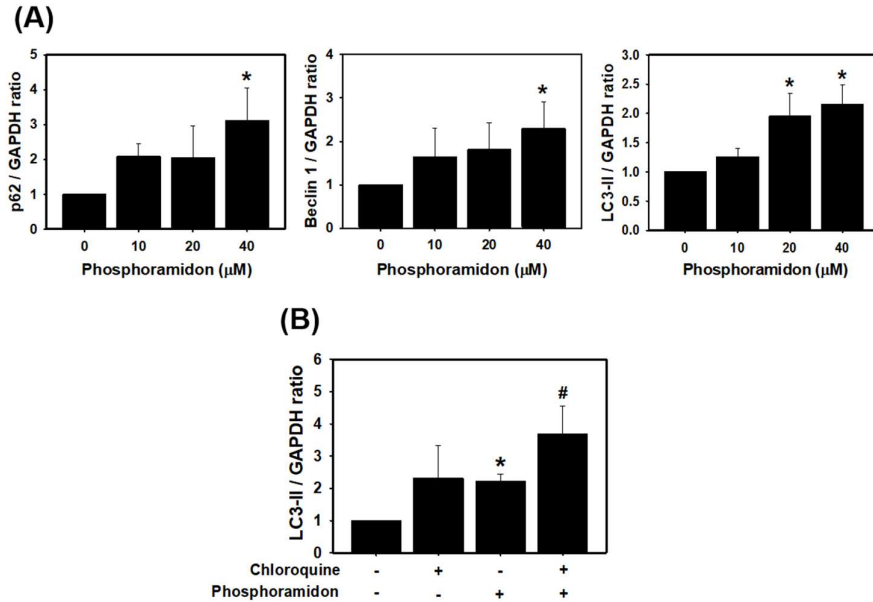

**Figure S3.** Effects of phosphoramidon treatment on autophagy in human kidney cells. (A) The autophagy-related proteins expression of histogram represent the average normalized densitometric values. \*P < 0.05 compared with the control. (B) Quantification of LC3-II in HK-2 cells treated with chloroquine and phosphoramidon. The cells were pretreated with chloroquine

(5  $\mu\text{M}$ ) for 1 h and then treated with phosphoramidon (20  $\mu\text{M}$ ) for 24 h. GAPDH was used as the internal control. Data are presented as the means  $\pm$  standard deviation of three independent experiments. \*P < 0.05 compared with the control. #P < 0.05 compared with the control. # p < 0.05 compared with the phosphoramidon.

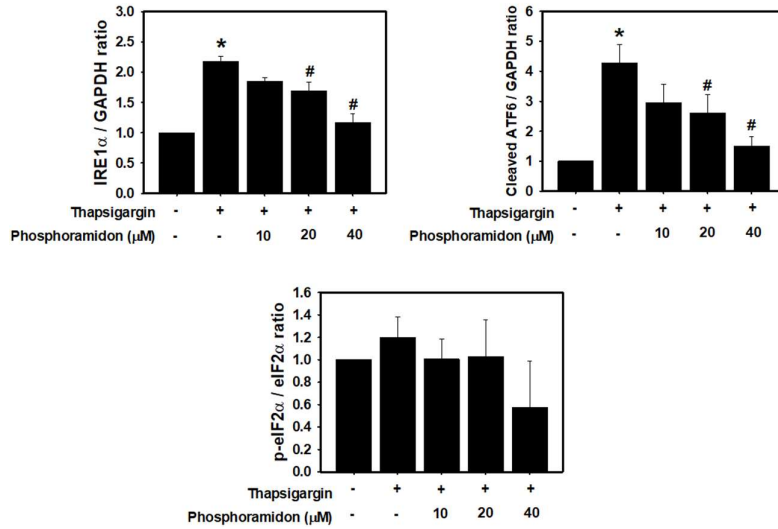

**Figure S4.** Effects of phosphoramidon treatment on the thapsigargin-induced ER stress in human kidney cells. The ER stress-related proteins expression of histogram represent the average normalized densitometric values. GAPDH was used as the internal control. Data are presented as the means  $\pm$  standard deviation of three independent experiments. \*P < 0.05 compared with the control. # p < 0.05 compared with thapsigargin.

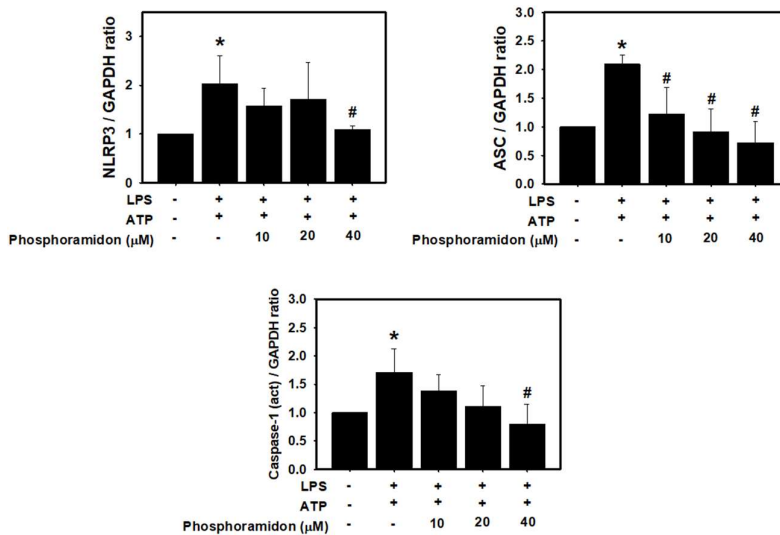

**Figure S5.** Effects of phosphoramidon treatment on the LPS+ATP-induced NLRP3 inflammasom in human kidney cells. The NLRP3 inflammasom-related proteins expression of histogram represent the average normalized densitometric values. GAPDH was used as the internal control. Data are presented as the means  $\pm$  standard deviation of three independent experiments. \*P < 0.05 compared with the control. # p < 0.05 compared with the LPS+ATP group.

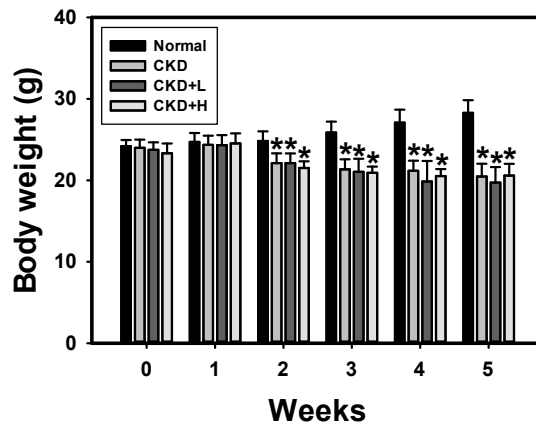

**Figure S6.** Measurement of body weights of C57BL/6 mice in various groups (5 mice per group). \* p < 0.05 compared with the normal group. Data are presented as the means  $\pm$  standard deviation.

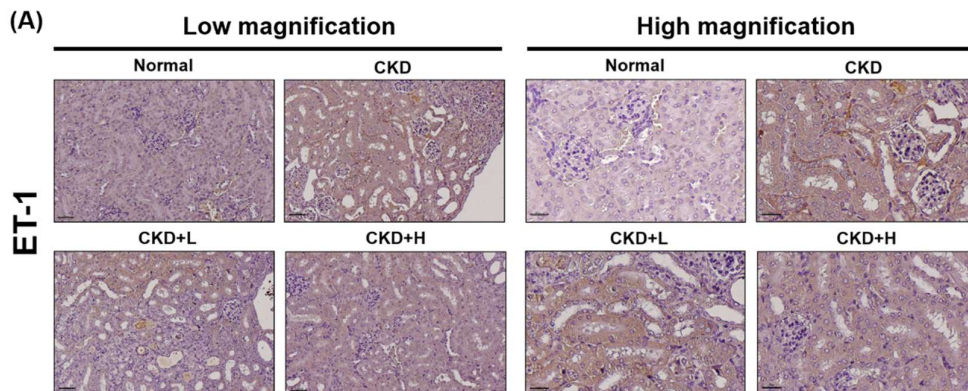

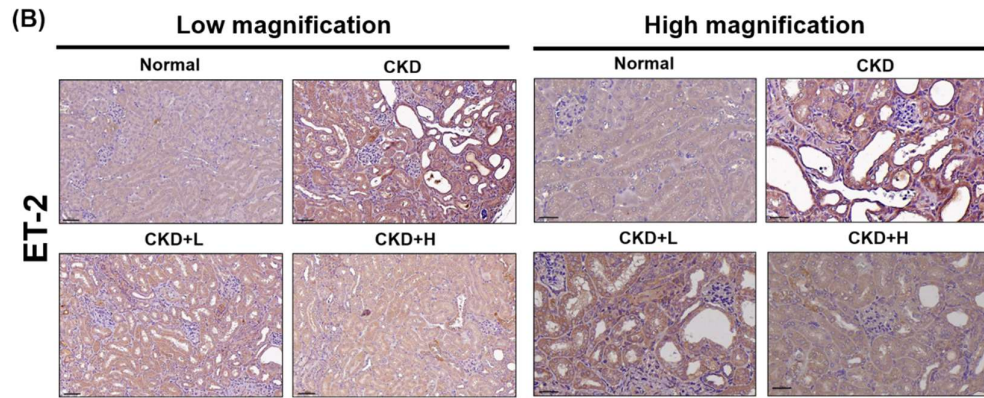

**Figure S7.** The ET-1 and ET-2 expression of kidneys after phosphoramidon treatment in the adenine diet-induced CKD model. IHC was used to determine the expression levels of ET-1 (A) and ET-2 (B) in kidney tissues. The scale bar of low magnification=60  $\mu\text{m}$ . The scale bar of high magnification=30  $\mu\text{m}$ .

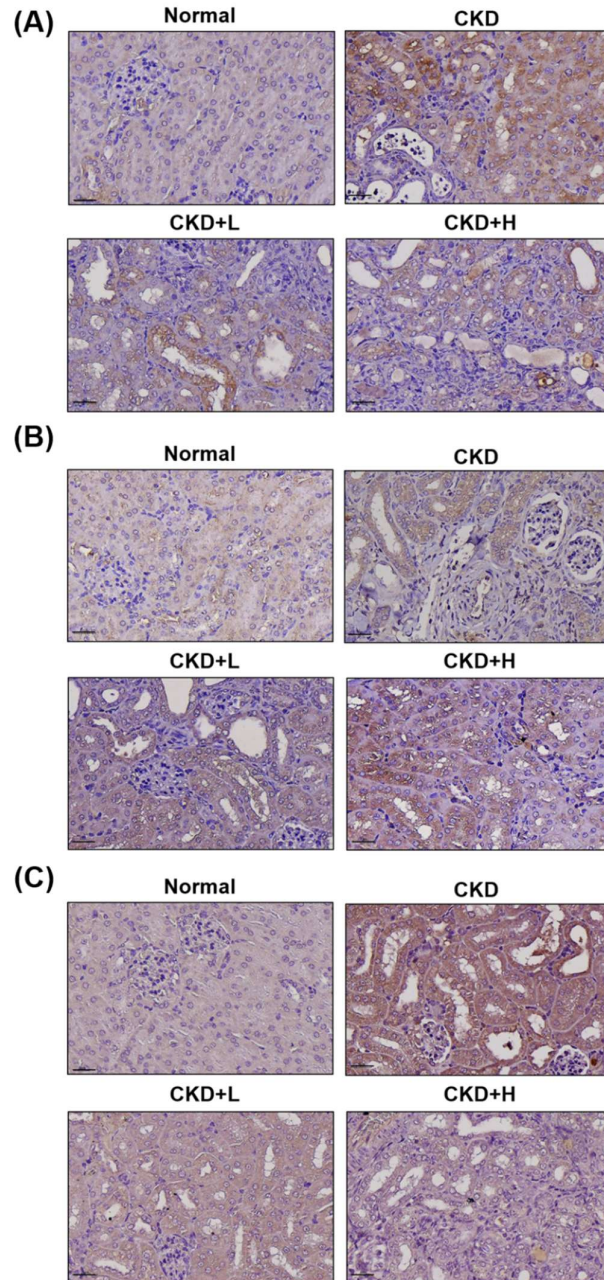

**Figure S8.** The high magnification of IHC images. Phosphoramidon regulates ER stress, autophagy and the NLRP3 inflammasome in the adenine diet-induced CKD model. The protein expression of IRE1 $\alpha$  (A), LC3 (B) and NLRP3 (C) in kidney sections in the indicated groups. Scale bar=30  $\mu$ m.



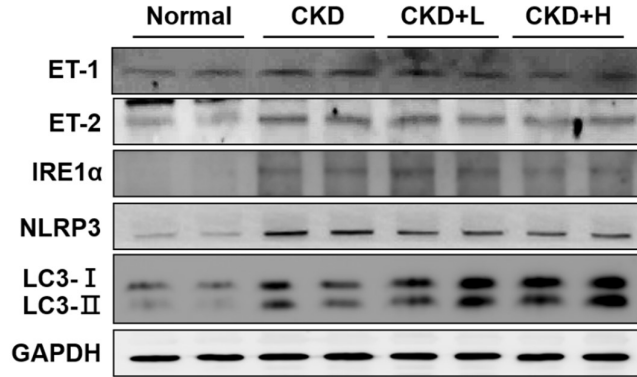

**Figure S9.** Western blot analysis of ET-1, ET-2, IRE1 $\alpha$ , LC3 and NLRP3 in kidney tissue sections in the indicated groups.

**Table S1.** The quantification of immunohistochemical (IHC) and masson staining.

| Item / Group                      | Normal          | CKD               | CKD+L             | CKD+H             |
|-----------------------------------|-----------------|-------------------|-------------------|-------------------|
| IRE1 $\alpha$ area (%)            | 1.11 $\pm$ 1.20 | 7.39 $\pm$ 1.37*  | 6.25 $\pm$ 1.72   | 3.25 $\pm$ 1.91#  |
| LC3 area (%)                      | 2.10 $\pm$ 1.62 | 5.56 $\pm$ 1.66*  | 7.23 $\pm$ 1.47#  | 8.90 $\pm$ 1.35#  |
| NLRP3 area (%)                    | 1.91 $\pm$ 1.06 | 26.19 $\pm$ 5.87* | 14.48 $\pm$ 5.86# | 10.75 $\pm$ 2.97# |
| ET-1 area (%)                     | 3.87 $\pm$ 1.39 | 18.75 $\pm$ 5.34* | 15.96 $\pm$ 5.18  | 9.10 $\pm$ 3.57#  |
| ET-2 area (%)                     | 3.50 $\pm$ 1.61 | 35.64 $\pm$ 4.09* | 21.99 $\pm$ 3.19# | 10.08 $\pm$ 2.33# |
| Masson staining positive area (%) | 0.2 $\pm$ 0.13  | 5.8 $\pm$ 1.86*   | 4.21 $\pm$ 1.19#  | 2.02 $\pm$ 0.61#  |

\*p<0.05, CKD compared with normal.

#p<0.05, CKD+L or CKD+H compared with CKD.
